# Supplementary material for: The Effectiveness of Multi-Component Interventions on the Positive and Negative Aspects of Well-Being among Informal Caregivers of People with Dementia: A Systematic Review and Meta-Analysis
Source: MDPI journal article supplement (doi:10.3390/ijerph19126973), 2022-06-07
Supplement: s1 [file s1]

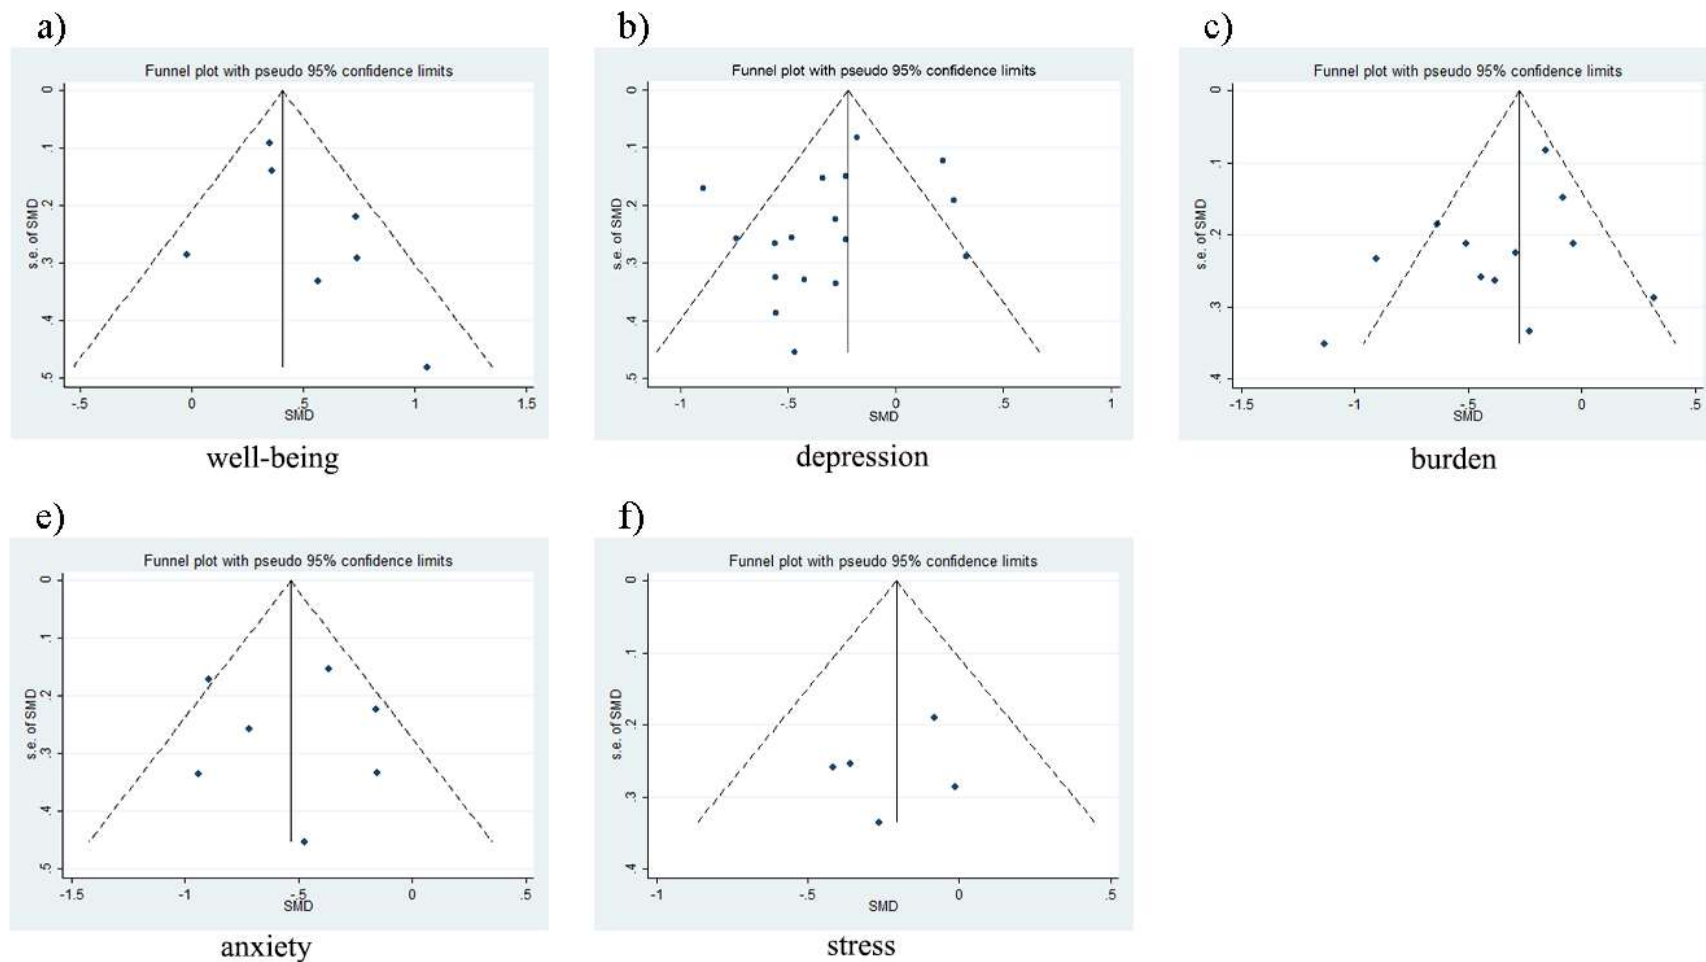

**Figure S3.** Funnel plots assessing publication bias on the meta-analysis of multicomponent intervention on informal caregiver outcomes (i.e. subjective well-being, depression, burden, anxiety, stress).
