# Supplementary material for: The Effectiveness of Multi-Component Interventions on the Positive and Negative Aspects of Well-Being among Informal Caregivers of People with Dementia: A Systematic Review and Meta-Analysis
Source: MDPI journal article supplement (doi:10.3390/ijerph19126973), 2022-06-07
Supplement: s1 [file s1]

**Table S4.** The results of subgroup analysis by delivery methods and participant types.

| Outcomes              |                       | Total effects<br>size<br>P [SMD<br>(95%CI)] | Delivery methods               |                                 |                               |                               | Participants                   |                                 |                              |
|-----------------------|-----------------------|---------------------------------------------|--------------------------------|---------------------------------|-------------------------------|-------------------------------|--------------------------------|---------------------------------|------------------------------|
|                       |                       |                                             | Subgroup<br>Differences<br>(P) | P [SMD (95%CI)]                 |                               |                               | Subgroup<br>Differences<br>(P) | P [SMD (95%CI)]                 |                              |
|                       |                       |                                             |                                | Face-to-face                    | Telephone                     | Online                        |                                |                                 | Only caregivers              |
| Primary<br>outcomes   | Subjective well-being | <0.001*<br>[0.41(0.28, 0.54)]               | 0.12                           | <0.001<br>[0.53(0.33, 0.73)]    | 0.0001<br>[0.35(0.17, 0.53)]  | 0.94<br>[-0.02(-0.58, 0.54)]  | 0.16                           | <0.001<br>[0.57(0.31, 0.82)]    | <0.001<br>[0.35(0.20, 0.50)] |
|                       | Depression            | 0.001*<br>[-0.29(-0.46, -0.11)]             | 0.46                           | 0.02<br>[-0.35(-0.65, -0.06)]   | 0.02<br>[-0.39(-0.75, -0.03)] | 0.04<br>[-0.19(-0.35, -0.02)] | 0.04*                          | <0.001<br>[-0.42(-0.62, -0.22)] | 0.42<br>[-0.09(-0.32, 0.14)] |
|                       | Burden                | 0.0003*<br>[-0.34(-0.53, -0.16)]            | 0.02*                          | <0.001<br>[-0.50(-0.76, -0.25)] | -                             | 0.07<br>[-0.15(-0.31, 0.01)]  | 0.05                           | <0.001<br>[-0.42(-0.64, -0.19)] | 0.05<br>[-0.14(-0.28, 0.00)] |
| Secondary<br>outcomes | Anxiety               | <0.001*<br>[-0.53(-0.78, -0.27)]            | 0.35                           | 0.0003<br>[-0.57(-0.87, -0.26)] | -                             | 0.02<br>[-0.36(-0.66, -0.07)] | -                              | -                               | -                            |
|                       | Stress                | 0.06<br>[-0.23(-0.47, 0.01)]                | 0.99                           | 0.15<br>[-0.23(-0.54, 0.08)]    | -                             | 0.23<br>[-0.23(-0.61, 0.14)]  | 0.95                           | 0.15<br>[-0.24(-0.59, 0.09)]    | 0.22<br>[-0.22(-0.58, 0.14)] |

Note: SMD=standard mean difference; CI=confidential interval; \*P<0.05.
