# Supplementary material for: The Effectiveness of Multi-Component Interventions on the Positive and Negative Aspects of Well-Being among Informal Caregivers of People with Dementia: A Systematic Review and Meta-Analysis
Source: MDPI journal article supplement (doi:10.3390/ijerph19126973), 2022-06-07
Supplement: s1 [file s1]

## Burden

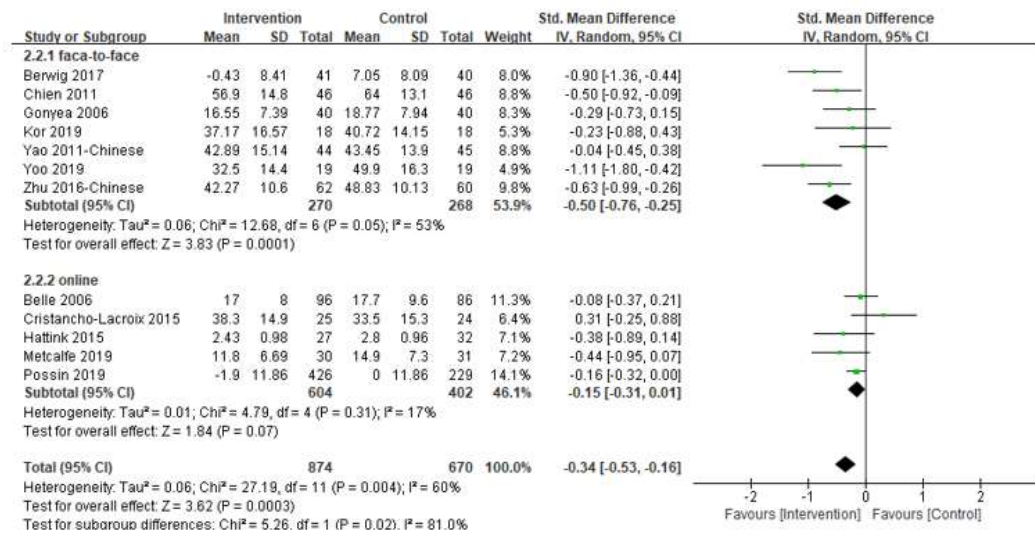

## Anxiety

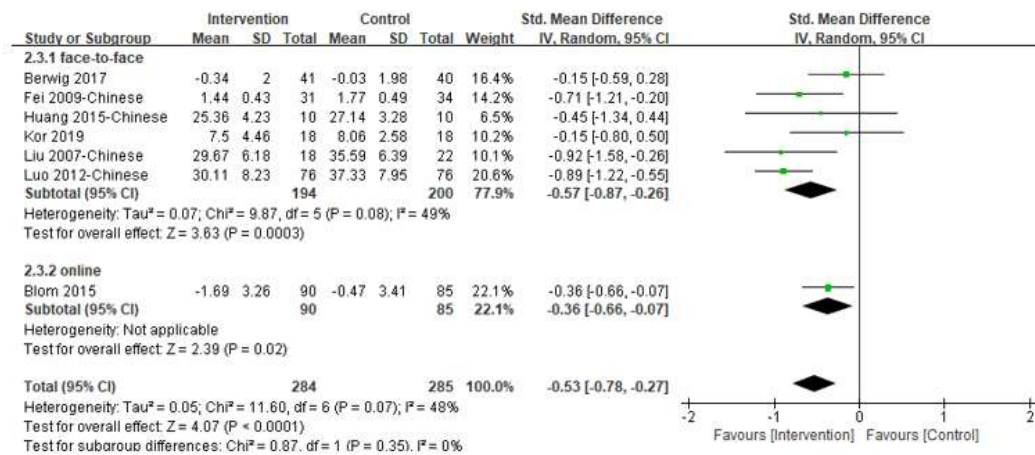

## Stress

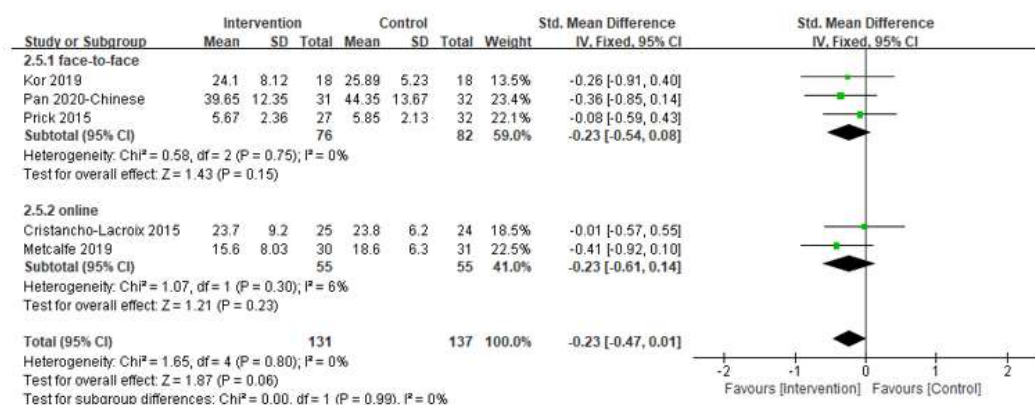

Note: CI = Confidence interval.

**Figure S2.** Effect of multi-component interventions on informal caregiver's burden, anxiety, and stress (postintervention).
