# Supplementary material for: The Effectiveness of Multi-Component Interventions on the Positive and Negative Aspects of Well-Being among Informal Caregivers of People with Dementia: A Systematic Review and Meta-Analysis
Source: MDPI journal article supplement (doi:10.3390/ijerph19126973), 2022-06-07
Supplement: s1 [file s1]

**Table S2.** The full electronic search strategy for the databases.

**Search strategy-English databases**

| <b>Databases</b> | <b>Search strategy-date limits: prior to June 30, 2020</b>                                                                                                                                                                                                                                                                              | <b>Items (-20200630)</b> |
|------------------|-----------------------------------------------------------------------------------------------------------------------------------------------------------------------------------------------------------------------------------------------------------------------------------------------------------------------------------------|--------------------------|
| 1.ALOIS          | <p>“multicomponent” OR “multi” OR “multidimensional” OR “combin intervention”</p> <p>OR “multimodel” OR “multifaceted” OR “multiple” OR “multifactorial” OR</p> <p>“multi-domain” OR “comprehensive”</p> <p>Study Type: Intervention Study</p> <p>Intervention type : Any</p> <p>Current Status: Completed</p> <p>Study Design: RCT</p> | 4                        |

| Databases       | Search strategy-date limits: prior to June 30, 2020                                                                                                                                                                                                                               | Items (-20200630) |
|-----------------|-----------------------------------------------------------------------------------------------------------------------------------------------------------------------------------------------------------------------------------------------------------------------------------|-------------------|
|                 | Study Aim: Caregiver Focused                                                                                                                                                                                                                                                      |                   |
| 2.MEDLINE(OVID) | 1. exp Dementia/<br><br>2. Wernicke Encephalopathy/<br><br>3. Dementia, Amnestic/<br><br>4. dement*.mp.<br><br>5. alzheimer*.mp.<br><br>6. (lewy* adj2 bod*).mp.<br><br>7. (chronic adj2 cerebrovascular).mp.<br><br>8. ("organic brain disease" or "organic brain syndrome").mp. | 894               |

| Databases | Search strategy-date limits: prior to June 30, 2020 | Items (-20200630) |
|-----------|-----------------------------------------------------|-------------------|
|           | 9. (cerebr* adj2 deteriorat*).mp.                   |                   |
|           | 10. (cerebral* adj2 insufficient*).mp.              |                   |
|           | 11. (pick* adj2 disease).mp.                        |                   |
|           | 12. (creutzfeldt or jcd or cjd).mp.                 |                   |
|           | 13. binswanger*.ab.                                 |                   |
|           | 14. huntington*.mp.                                 |                   |
|           | 15. or/1-14                                         |                   |
|           | 16. caregiver*.mp.                                  |                   |
|           | 17. exp Caregiver/                                  |                   |

| Databases | Search strategy-date limits: prior to June 30, 2020 | Items (-20200630) |
|-----------|-----------------------------------------------------|-------------------|
|           | 18. 'informal caregiver*.ti,ab.                     |                   |
|           | 19. carer*.mp.                                      |                   |
|           | 20. spous*.ti,ab.                                   |                   |
|           | 21. partner*.ti,ab.                                 |                   |
|           | 22. family*.ti,ab.                                  |                   |
|           | 23. relative*.ti,ab.                                |                   |
|           | 24. neighbor*.ti,ab.                                |                   |
|           | 25. or/16-24                                        |                   |
|           | 26. multi?component*.ti,ab.                         |                   |

| Databases | Search strategy-date limits: prior to June 30, 2020 | Items (-20200630) |
|-----------|-----------------------------------------------------|-------------------|
|           | 27. (multi* adj2 intervention*).ti,ab.              |                   |
|           | 28. multi?domain.ti,ab.                             |                   |
|           | 29. multidimensional*.ti,ab.                        |                   |
|           | 30. comprehensive.ti,ab.                            |                   |
|           | 31. (combin* adj2 intervention*).ti,ab.             |                   |
|           | 32. (multi* adj2 model).ti,ab.                      |                   |
|           | 33. multifaceted*.ti,ab.                            |                   |
|           | 34. multiple.ti,ab.                                 |                   |

| Databases | Search strategy-date limits: prior to June 30, 2020                                                   | Items (-20200630) |
|-----------|-------------------------------------------------------------------------------------------------------|-------------------|
|           | <p>35. (pharmacological or pharmacology or "drug therapy" or drugs or<br/>psychopharmacology).mp.</p> |                   |
|           | <p>36. or/26-34</p>                                                                                   |                   |
|           | <p>37. 36 not 35</p>                                                                                  |                   |
|           | <p>38. randomized controlled trial.pt.</p>                                                            |                   |
|           | <p>39. controlled clinical trial.pt.</p>                                                              |                   |
|           | <p>40. randomized.ab.</p>                                                                             |                   |
|           | <p>41. placebo.ab.</p>                                                                                |                   |
|           | <p>42. randomly.ab.</p>                                                                               |                   |

| Databases | Search strategy-date limits: prior to June 30, 2020 | Items (-20200630) |
|-----------|-----------------------------------------------------|-------------------|
|           | 43. trial.ab.                                       |                   |
|           | 44. groups.ab.                                      |                   |
|           | 45. ("double-blind*" or "single-blind*").ti,ab.     |                   |
|           | 46. "double?blind*".ti,ab.                          |                   |
|           | 47. (animals not (humans and animals)).sh.          |                   |
|           | 48. or/38-46                                        |                   |
|           | 49. 48 not 47                                       |                   |
|           | 50. 15 and 25 and 37 and 49                         |                   |
|           | 51. English language and yr="1860 - 2020"           |                   |

| Databases | Search strategy-date limits: prior to June 30, 2020                                                                                                                                                                                                                                                                                                                                          | Items (-20200630) |
|-----------|----------------------------------------------------------------------------------------------------------------------------------------------------------------------------------------------------------------------------------------------------------------------------------------------------------------------------------------------------------------------------------------------|-------------------|
| 3.EMBASE  | <ol style="list-style-type: none"> <li>1. 'dementia'/exp</li> <li>2. 'Wernicke Encephalopathy*':ab,ti</li> <li>3. amnestic:ab,ti</li> <li>4. dement*:ab,ti</li> <li>5. alzheimer*:ab,ti</li> <li>6. 'lewy* bod*':ab,ti</li> <li>7. 'chronic* cerebrovascular'</li> <li>8. 'organic brain disease':ab,ti OR 'organic brain syndrome':ab,ti</li> <li>9. 'cerebr* deteriorat*':ab,ti</li> </ol> | 1399              |



| Databases | Search strategy-date limits: prior to June 30, 2020                         | Items (-20200630) |
|-----------|-----------------------------------------------------------------------------|-------------------|
|           | 10. 'cerebral* insufficient*':ab,ti                                         |                   |
|           | 11. 'pick presenile dementia':ab,ti                                         |                   |
|           | 12. binswanger*:ab,ti                                                       |                   |
|           | 13. huntington*:ab,ti                                                       |                   |
|           | 14. #1 OR #2 OR #3 OR #4 OR #5 OR #6 OR #7 OR #8 OR #9 OR #10 OR #11 OR #12 |                   |
|           | OR #13                                                                      |                   |
|           | 15. caregiver/de                                                            |                   |
|           | 16. caregiver*:ab,ti                                                        |                   |
|           | 17. 'informal caregiver*':ab,ti                                             |                   |

| Databases | Search strategy-date limits: prior to June 30, 2020             | Items (-20200630) |
|-----------|-----------------------------------------------------------------|-------------------|
|           | 18. carer*:ab,ti                                                |                   |
|           | 19. spous*:ab,ti                                                |                   |
|           | 20. partner*:ab,ti                                              |                   |
|           | 21. family*:ab,ti                                               |                   |
|           | 22. relative*:ab,ti                                             |                   |
|           | 23. neighbor*:ab,ti                                             |                   |
|           | 24. #15 OR #16 OR #17 OR #18 OR #19 OR #20 OR #21 OR #22 OR #23 |                   |
|           | 25. 'multi*component':ab,ti                                     |                   |
|           | 26. 'multi* intervention*':ab,ti                                |                   |

| Databases | Search strategy-date limits: prior to June 30, 2020                                     | Items (-20200630) |
|-----------|-----------------------------------------------------------------------------------------|-------------------|
|           | 27. 'multi*domain':ab,ti                                                                |                   |
|           | 28. multidimensional*:ab,ti                                                             |                   |
|           | 29. comprehensive:ab,ti                                                                 |                   |
|           | 30. 'combin* intervention*':ab,ti                                                       |                   |
|           | 31. 'multi* model':ab,ti                                                                |                   |
|           | 32. multifaceted*:ab,ti                                                                 |                   |
|           | 33. multiple:ab,ti                                                                      |                   |
|           | 34. pharmacological OR pharmacology OR 'drug therapy' OR drugs OR<br>psychopharmacology |                   |

| Databases | Search strategy-date limits: prior to June 30, 2020             | Items (-20200630) |
|-----------|-----------------------------------------------------------------|-------------------|
|           | 35. #25 OR #26 OR #27 OR #28 OR #29 OR #30 OR #31 OR #32 OR #33 |                   |
|           | 36. 35 NOT 34                                                   |                   |
|           | 37. 'randomized controlled trial':ab,ti                         |                   |
|           | 38. 'controlled clinical trial':ab,ti                           |                   |
|           | 39. randomized: :ab,ti                                          |                   |
|           | 40. placebo:ab                                                  |                   |
|           | 41. randomly:ab                                                 |                   |
|           | 42. trial:ab                                                    |                   |
|           | 43. groups:ab                                                   |                   |

| Databases | Search strategy-date limits: prior to June 30, 2020                    | Items (-20200630) |
|-----------|------------------------------------------------------------------------|-------------------|
|           | 44. 'double* blind':ab                                                 |                   |
|           | 45. 'single* blind':ab                                                 |                   |
|           | 46. 'double blind*':ab,ti                                              |                   |
|           | 47. #37 OR #38 OR #39 OR #40 OR #41 OR #42 OR #43 OR #44 OR #45 OR #46 |                   |
|           | 48. 'humans and animals'                                               |                   |
|           | 49. animal                                                             |                   |
|           | 50. 47 not 48                                                          |                   |
|           | 51. 50 not 49                                                          |                   |

| Databases | Search strategy-date limits: prior to June 30, 2020                                                                                                                                                                                                                                                                                                                                                                                                                                         | Items (-20200630) |
|-----------|---------------------------------------------------------------------------------------------------------------------------------------------------------------------------------------------------------------------------------------------------------------------------------------------------------------------------------------------------------------------------------------------------------------------------------------------------------------------------------------------|-------------------|
|           | <p>52. #14 AND #24 AND #36 AND #51 AND ([chinese]/lim OR [english]/lim) AND</p> <p>[&lt;1966-2020]/py</p>                                                                                                                                                                                                                                                                                                                                                                                   |                   |
| 4.LILACS  | <p>1. (dementia OR alzheimer\$ OR demenc\$ OR AD OR demência) AND (carer\$ OR</p> <p>caregiver\$ OR informal caregiver\$ OR spous\$ OR partner\$ OR family OR</p> <p>relative\$ OR neighbor\$ OR MH:"caregiver" OR MH:"family") AND</p> <p>(multi\$component\$ OR multi\$intervention\$ OR multi\$domain OR</p> <p>multidimensional OR comprehensive OR combin\$intervention\$ OR</p> <p>multi\$model OR multifaceted OR multi\$faceted OR multiple OR</p> <p>multi\$factorial) [Words]</p> | 11                |

| Databases           | Search strategy-date limits: prior to June 30, 2020                        | Items (-20200630) |
|---------------------|----------------------------------------------------------------------------|-------------------|
| 5.PsycINFO ( OVID ) | 2. randomly OR randomised OR randomized OR trial OR ensaio clínico [Words] |                   |
|                     | 3. English [Language]                                                      |                   |
|                     | 4. #1 AND #2 AND #3                                                        |                   |
|                     | 1. exp Dementia/                                                           | 537               |
|                     | 2. exp Wernickes Syndrome/                                                 |                   |
|                     | 3. dement*.mp.                                                             |                   |
|                     | 4. alzheimer*.mp.                                                          |                   |
|                     | 5. (lewy* adj2 bod*).mp.                                                   |                   |
|                     | 6. (chronic adj2 cerebrovascular).mp.                                      |                   |
|                     |                                                                            |                   |

| Databases | Search strategy-date limits: prior to June 30, 2020                                                                                                                                                                                                                                                                                         | Items (-20200630) |
|-----------|---------------------------------------------------------------------------------------------------------------------------------------------------------------------------------------------------------------------------------------------------------------------------------------------------------------------------------------------|-------------------|
|           | <p>7. ("organic brain disease" or "organic brain syndrome").mp.</p> <p>8. (cerebr* adj2 deteriorat*).mp.</p> <p>9. (cerebral* adj2 insufficient*).mp.</p> <p>10. (pick* adj2 disease).mp.</p> <p>11. (creutzfeldt or jcd or cjd).mp.</p> <p>12. binswanger*.mp.</p> <p>13. huntington*.mp.</p> <p>14. or/1-13</p> <p>15. caregiver*.mp.</p> |                   |



| Databases | Search strategy-date limits: prior to June 30, 2020                                                                                                                                                                                                     | Items (-20200630) |
|-----------|---------------------------------------------------------------------------------------------------------------------------------------------------------------------------------------------------------------------------------------------------------|-------------------|
|           | <p>16. exp caregivers/</p> <p>17. (informal adj2 caregiver*).ti,ab.</p> <p>18. carer*.mp.</p> <p>19. spous*.ti,ab.</p> <p>20. partner*.ti,ab.</p> <p>21. family*.ti,ab.</p> <p>22. relative*.ti,ab.</p> <p>23. neighbor*.ti,ab.</p> <p>24. or/15-23</p> |                   |

| Databases | Search strategy-date limits: prior to June 30, 2020 | Items (-20200630) |
|-----------|-----------------------------------------------------|-------------------|
|           | 25. multi*component*.mp.                            |                   |
|           | 26. (multi* adj2 intervention*).ti,ab.              |                   |
|           | 27. multi*domain.mp.                                |                   |
|           | 28. multidimensional*.ti,ab.                        |                   |
|           | 29. comprehensive.ti,ab.                            |                   |
|           | 30. (combin* adj2 intervention*).ti,ab.             |                   |
|           | 31. (multi* adj2 model).ti,ab.                      |                   |
|           | 32. multifaceted*.ti,ab.                            |                   |
|           | 33. multiple.ti,ab.                                 |                   |

| Databases | Search strategy-date limits: prior to June 30, 2020                                                                                                                                                                                                                                                             | Items (-20200630) |
|-----------|-----------------------------------------------------------------------------------------------------------------------------------------------------------------------------------------------------------------------------------------------------------------------------------------------------------------|-------------------|
|           | <p>34. (pharmacological or pharmacology or "drug therapy" or drugs or<br/>psychopharmacology).mp.</p> <p>35. or/25-33</p> <p>36. 35 not 34</p> <p>37. "randomized controlled trial".pt.</p> <p>38. "controlled clinical trial".pt.</p> <p>39. randomized.ab.</p> <p>40. placebo.ab.</p> <p>41. randomly.ab.</p> |                   |

| Databases | Search strategy-date limits: prior to June 30, 2020 | Items (-20200630) |
|-----------|-----------------------------------------------------|-------------------|
|           | 42. trial.ab.                                       |                   |
|           | 43. groups.ab.                                      |                   |
|           | 44. ("double-blind*" or "single-blind*").ti,ab.     |                   |
|           | 45. "double blind*".ti,ab.                          |                   |
|           | 46. (animals not (humans and animals)).sh.          |                   |
|           | 47. or/37-45                                        |                   |
|           | 48. 47 not 46                                       |                   |
|           | 49. 14 AND 24 AND 36 AND 48                         |                   |
|           | 50. English [Language]                              |                   |

| Databases  | Search strategy-date limits: prior to June 30, 2020        | Items (-20200630) |
|------------|------------------------------------------------------------|-------------------|
| 6.CINAHL ( | S1. MH "dementia"                                          | 206               |
| EBSCOhost) | S2. MH "Dementia, Amnestic"                                |                   |
|            | S3. MH "Wernicke's Encephalopathy"                         |                   |
|            | S4. AB dement*                                             |                   |
|            | S5. AB alzheimer*                                          |                   |
|            | S6. AB "lewy* N2 bod*"                                     |                   |
|            | S7. AB "chronic N2 cerebrovascular"                        |                   |
|            | S8. AB "organic brain disease" or "organic brain syndrome" |                   |
|            | S9. AB "cerebral* N2 insufficient*"                        |                   |

| Databases | Search strategy-date limits: prior to June 30, 2020                      | Items (-20200630) |
|-----------|--------------------------------------------------------------------------|-------------------|
|           | S10. AB "pick* N2 disease"                                               |                   |
|           | S11. AB binswanger*                                                      |                   |
|           | S12. AB huntington*                                                      |                   |
|           | S13. S1 OR S2 OR S3 OR S4 OR S5 OR S6 OR S7 OR S8 OR S9 OR S10 OR S11 OR |                   |
|           | S12                                                                      |                   |
|           | S14. MH caregiver                                                        |                   |
|           | S15. AB caregiver*                                                       |                   |
|           | S16. AB "informal caregiver*"                                            |                   |
|           | S17. AB spous*                                                           |                   |

| Databases | Search strategy-date limits: prior to June 30, 2020       | Items (-20200630) |
|-----------|-----------------------------------------------------------|-------------------|
|           | S18. AB partner*                                          |                   |
|           | S19. AB famil*                                            |                   |
|           | S20. AB relative*                                         |                   |
|           | S21. AB neighbor*                                         |                   |
|           | S22. S14 OR S15 OR S16 OR S17 OR S18 OR S19 OR S20 OR S21 |                   |
|           | S23. TX "multi*component*"                                |                   |
|           | S24. TX "multi* N2 intervention*"                         |                   |
|           | S25. TX "multi*domain"                                    |                   |
|           | S26. TX multidimensional*                                 |                   |

| Databases | Search strategy-date limits: prior to June 30, 2020                                         | Items (-20200630) |
|-----------|---------------------------------------------------------------------------------------------|-------------------|
|           | S27. AB comprehensive                                                                       |                   |
|           | S28. AB "combin* intervention*"                                                             |                   |
|           | S29. AB "multi* N2 model"                                                                   |                   |
|           | S30. AB multifaceted*                                                                       |                   |
|           | S31. AB multiple                                                                            |                   |
|           | S32. TX pharmacological OR pharmacology OR "drug therapy" OR drugs OR<br>psychopharmacology |                   |
|           | S33. S23 OR S24 OR S25 OR S26 OR S27 OR S28 OR S29 OR S30 OR S31                            |                   |
|           | S34. S34 NOT S32                                                                            |                   |



| Databases | Search strategy-date limits: prior to June 30, 2020 | Items (-20200630) |
|-----------|-----------------------------------------------------|-------------------|
|           | S35. TX "randomized controlled trial"               |                   |
|           | S36. TX RCT                                         |                   |
|           | S37. TX "controlled clinical trial"                 |                   |
|           | S38. AB placebo*                                    |                   |
|           | S39. AB randomized                                  |                   |
|           | S40. AB randomised                                  |                   |
|           | S41. AB randomly                                    |                   |
|           | S42. AB groups OR "control group"                   |                   |
|           | S43. AB "double-blind*" OR "single-blind*"          |                   |

| Databases        | Search strategy-date limits: prior to June 30, 2020                                                                                                                                                                                                                   | Items (-20200630) |
|------------------|-----------------------------------------------------------------------------------------------------------------------------------------------------------------------------------------------------------------------------------------------------------------------|-------------------|
|                  | <p>S44. AB "double#blind"</p> <p>S45. S35 OR S36 OR S37 OR S38 OR S39 S40 OR S41 OR S42 OR S43 OR S44</p> <p>S46. S13 AND S22 AND S34 AND S45</p> <p>S47. Published Date: -20200630;</p> <p>S48. English Language</p>                                                 |                   |
| 7.Web of science | <p>#1. TS=(Alzheimer OR dementia* OR Alzheimer* OR "AD" OR "Wernicke</p> <p>Encephalopathy*" OR amnestic OR Binswanger OR huntington OR lewy OR</p> <p>"pick presenile" OR "cerebr* deterioration" OR "organic brain disease" OR</p> <p>"organic brain syndrome")</p> | 1196              |

| Databases | Search strategy-date limits: prior to June 30, 2020                                                                                                                                                                                                                                                                                                                                                                                                                                                       | Items (-20200630) |
|-----------|-----------------------------------------------------------------------------------------------------------------------------------------------------------------------------------------------------------------------------------------------------------------------------------------------------------------------------------------------------------------------------------------------------------------------------------------------------------------------------------------------------------|-------------------|
|           | <p>#2. TS=(carer* OR caregiver* OR "informal caregiver*" OR spouse OR partner OR<br/> famil* OR relative* OR neighbor*)</p> <p>#3. TS=("multi*component*" OR "multi* intervention*" OR "multi*domain" OR<br/> multidimensional OR comprehensive OR "combin* intervention*" OR<br/> "multi*model" OR multifaceted OR "multi*faceted" OR multiple OR<br/> "multi*factorial")</p> <p>#4. TS=(pharmacological OR pharmacology OR "drug therapy" OR drugs OR<br/> psychopharmacology)</p> <p>#5. #3 not #4</p> |                   |

| Databases | Search strategy-date limits: prior to June 30, 2020                                                                                                                                                    | Items (-20200630) |
|-----------|--------------------------------------------------------------------------------------------------------------------------------------------------------------------------------------------------------|-------------------|
|           | <p>#6. TS=("randomized controlled trial" OR randomized OR randomised OR<br/> randomly OR trial OR RCT OR placebo OR "control group" OR "double-blind*" OR<br/> "double blind*" OR "single-blind*")</p> |                   |
|           | #7. TS=(animals not (humans and animals))                                                                                                                                                              |                   |
|           | #8. #6 not #7                                                                                                                                                                                          |                   |
|           | #9. #1 AND #2 AND #5 AND #8                                                                                                                                                                            |                   |
|           | #10. Timespan=-20200630                                                                                                                                                                                |                   |
|           | #11. Search language=English                                                                                                                                                                           |                   |

## Search strategy-Chinese databases

| Databases                 | Search strategy-date limits: prior to June 30, 2020                                                                                                                                                                                                                                                                    | Items(-20200630) |
|---------------------------|------------------------------------------------------------------------------------------------------------------------------------------------------------------------------------------------------------------------------------------------------------------------------------------------------------------------|------------------|
| Wanfang<br>(万方)           | 题名或关键词:(痴呆 OR 阿尔茨海默 OR 阿尔兹海默 OR 失智症 OR 认知症)*题名或关键词:(照顾者 OR 照护者 OR 配偶 OR 家属 OR 家人 OR 儿女 OR 子女 OR 亲属 OR 朋友 OR 邻居)*题名或关键词:(干预 OR 治疗 OR 训练 OR 培训 OR 疗法 OR 支持 OR 多模式照护)                                                                                                                                                     | 238              |
| CBM<br>(中国生物医学文献<br>服务系统) | (( "痴呆"[核心字段:智能] OR "阿尔茨海默"[核心字段:智能] OR "阿尔兹海默"[核心字段:智能] OR "失智症"[核心字段:智能] OR "认知症"[核心字段:智能]) AND ("照顾者"[核心字段:智能] OR "照护者"[核心字段:智能] OR "配偶"[核心字段:智能] OR "家属"[核心字段:智能] OR "家人"[核心字段:智能] OR "儿女"[核心字段:智能] OR "子女"[核心字段:智能] OR "亲属"[核心字段:智能] OR "朋友"[核心字段:智能] OR "邻居"[核心字段:智能]) AND ( "干预"[核心字段:智能] OR "治疗"[核心字段:智能] OR " | 182              |

| Databases           | Search strategy-date limits: prior to June 30, 2020                                                                                                                                                                                                                                                                                             | Items(-20200630) |
|---------------------|-------------------------------------------------------------------------------------------------------------------------------------------------------------------------------------------------------------------------------------------------------------------------------------------------------------------------------------------------|------------------|
|                     | <p>训练"[核心字段:智能] OR "培训"[核心字段:智能] OR "疗法"[核心字段:智能] OR "支持"[核心字段:智能] OR "多模式照护"[核心字段:智能])) AND -2020[日期]</p>                                                                                                                                                                                                                                      |                  |
| <p>VIP<br/>(维普)</p> | <p>(((题名或关键词=痴呆 OR 题名或关键词=阿尔茨海默) OR 题名或关键词=阿尔兹海默) OR 题名或关键词=失智症) OR 题名或关键词=认知症) AND ((((((题名或关键词=照顾者 OR 题名或关键词=照护者) OR 题名或关键词=配偶) OR 题名或关键词=家属) OR 题名或关键词=家人) OR 题名或关键词=儿女) OR 题名或关键词=子女)OR 题名或关键词=亲属) OR 题名或关键词=朋友) OR 题名或关键词=邻居)) AND (((题名或关键词=干预 OR 题名或关键词=治疗) OR 题名或关键词=训练) OR 题名或关键词=培训 OR 题名或关键词=疗法) OR 题名或关键词=支持) OR 题名或关键词=多模式照护))</p> | <p>141</p>       |

| Databases | Search strategy-date limits: prior to June 30, 2020                                                                                                                                                                                                                                                                                                                                                                                                                                                                                                                                                                                            | Items(-20200630) |
|-----------|------------------------------------------------------------------------------------------------------------------------------------------------------------------------------------------------------------------------------------------------------------------------------------------------------------------------------------------------------------------------------------------------------------------------------------------------------------------------------------------------------------------------------------------------------------------------------------------------------------------------------------------------|------------------|
| CNKI      | <p data-bbox="383 376 1765 413">(TI=('痴呆' + '阿尔茨海默' + '阿尔兹海默' + '失智症' + '认知症') OR KY=('痴呆' + '阿尔茨海默' + '阿</p> <p data-bbox="383 477 1765 513">(中国知网) 尔兹海默' + '失智症' + '认知症')) AND (TI=('照顾者' + '照护者' + '配偶' + '家属' + '家人' + '儿女' + '子</p> <p data-bbox="383 577 1765 614">女' + '亲属' + '朋友' + '邻居') OR KY=('照顾者' + '照护者' + '配偶' + '家属' + '儿女' + '亲属' + '朋友' + '</p> <p data-bbox="383 678 1765 715">邻居')) AND (TI=('干预' + '治疗' + '训练' + '培训') OR KY=('干预' + '治疗' + '训练' + '培训' + '疗法' + '</p> <p data-bbox="383 778 1765 815">支持' + '多模式照护'))</p> <p data-bbox="383 879 1765 916">中文文献</p> <p data-bbox="383 979 1765 1016">发表时间：-2020-06-30</p> | 138              |
