# Supplementary material for: The Effectiveness of Multi-Component Interventions on the Positive and Negative Aspects of Well-Being among Informal Caregivers of People with Dementia: A Systematic Review and Meta-Analysis
Source: MDPI journal article supplement (doi:10.3390/ijerph19126973), 2022-06-07
Supplement: s1 [file s1]

**Table S3.** Characteristics of included studies.

| Author<br>(Year)                  | Country              | Participants                                                                     | Intervention                                                                                                                                                                                                                       | Control                                                      | Outcomes                                                         | Follow-up        |
|-----------------------------------|----------------------|----------------------------------------------------------------------------------|------------------------------------------------------------------------------------------------------------------------------------------------------------------------------------------------------------------------------------|--------------------------------------------------------------|------------------------------------------------------------------|------------------|
| (Au, et al., 2014) <sup>[1]</sup> | China<br>(Hong Kong) | Informal family caregivers<br>Int: 58.1, 78.6% female<br>Con:55.1, 77.4% female  | Telephone-assisted pleasant-event scheduling (TAPES) : behavioral activation and the pleasant event schedule + six subsequent telephone calls of 20 minutes each +adaptive coping and regular weekly meetings<br><br>1month (N=30) | Usual care (N=30)                                            | 1.Depression: CES-D<br><br>2.Self-Efficacy: RSCSE                | Postintervention |
| (Au, et al., 2015) <sup>[2]</sup> | China<br>(Hong Kong) | Informal family caregivers<br>Int: 55.2, 93.1% female<br>Con: 57.9, 73.3% female | PsyED-BA<br><br>Four weeks psychoeducation program telephone calls lasting 30 minutes (information +stress coping + pleasant events + communication) +behavioral activation (Eight biweekly                                        | PsyED: the materials of the psychoed ucation* program (N=30) | 1.Depression: CES-D (22)<br><br>2.Relationship satisfaction: RAS | Postintervention |

|                                       |               |                                                           |                                                                                                                                                                      |                                                                |                                                               |                              |
|---------------------------------------|---------------|-----------------------------------------------------------|----------------------------------------------------------------------------------------------------------------------------------------------------------------------|----------------------------------------------------------------|---------------------------------------------------------------|------------------------------|
|                                       |               |                                                           | telephone call lasting 15 to 20 minutes) +social work services                                                                                                       |                                                                |                                                               |                              |
|                                       |               |                                                           | 5months(N=29)                                                                                                                                                        |                                                                |                                                               |                              |
| (Belle, et al., 2006) <sup>[3]</sup>  | United States | Informal family caregivers                                | REACH-(Dyadic):                                                                                                                                                      | Education materials +2 brief telephone "check-in" calls (N=86) | 1.Depression: CES-D (10)<br>2.Burden: ZBI (12)                | Postintervention             |
|                                       |               | Int: 63.2, 81.4% female                                   | Information +didactic instruction +role playing +problem solving +skills training                                                                                    |                                                                |                                                               |                              |
|                                       |               | Con: 63.5, 81.2% female                                   | +stress management techniques +telephone support groups                                                                                                              |                                                                |                                                               |                              |
|                                       |               | +care recipients: Alzheimer disease or relative disorders | 6 months(N=96)                                                                                                                                                       |                                                                |                                                               |                              |
|                                       |               | Int: 78.6, 54.7% female                                   |                                                                                                                                                                      |                                                                |                                                               |                              |
|                                       |               | Con: 77.5, 45.8% female                                   |                                                                                                                                                                      |                                                                |                                                               |                              |
| (Berwig, et al., 2017) <sup>[4]</sup> | German        | Informal caregivers                                       | DE-REACH intervention:                                                                                                                                               | Usual care (N=40)                                              | 1.Burden: ZBI (22)<br>2.Anxiety: PHQ-4<br>3.Depression: PHQ-4 | Postintervention<br>9 months |
|                                       |               | Int: 72.3, 68.0% female                                   | Information transfer +psycho-education +role-playing +problem-solving +practice of skills +techniques for stress management +caregiver notebook +local support group |                                                                |                                                               |                              |
|                                       |               | Con: 74.0, 64.0% female                                   |                                                                                                                                                                      |                                                                |                                                               |                              |

|                                                     |                 |                                                                                                                                                                     |                                                                                                                                                                                                                                                                                                                                                           |                                                               |                                                                                                                                                         |
|-----------------------------------------------------|-----------------|---------------------------------------------------------------------------------------------------------------------------------------------------------------------|-----------------------------------------------------------------------------------------------------------------------------------------------------------------------------------------------------------------------------------------------------------------------------------------------------------------------------------------------------------|---------------------------------------------------------------|---------------------------------------------------------------------------------------------------------------------------------------------------------|
|                                                     |                 |                                                                                                                                                                     | 6 months (N=41)                                                                                                                                                                                                                                                                                                                                           |                                                               |                                                                                                                                                         |
| (Birkenhä<br>ger-<br>Gillesse, et<br>al., 2020) [5] | Netherla<br>nds | Family caregivers:<br><br>Int: 72.5, 76.3% female<br><br>Con: 73.2, 74.0% female<br><br>People with dementia:<br><br>Int: 76.3<br><br>Con: 77.6                     | (Dyadic)<br><br>14 Psycho-educational sessions<br>(isolation + medical aspects of<br>dementia + planning for the<br>future + re-rolling + reminiscence<br>and orientation +<br>communication + provide<br>strategies to cope with criticism +<br>activities +safety + nursing<br>skills+ exercise + nutrition + self-<br>care + using community services) | Usual care<br>(N=38)                                          | 1.Satisfaction of 3 months<br>life: VAS<br><br>2.Burden: Self-<br>Rated Burden<br>Scale-VAS<br><br>3.Depression: CES-<br>D<br><br>4.Anxiety: HADS-<br>A |
|                                                     |                 |                                                                                                                                                                     | 5 days (N=49)                                                                                                                                                                                                                                                                                                                                             |                                                               |                                                                                                                                                         |
| (Blom, et<br>al., 2015) [6]                         | Netherla<br>nds | Family caregivers:(CES-<br>D>4 or HADS-A>3 or a<br>burden score>6 on a scale<br>ranging from 0 to 10)<br><br>Int: 61.5, 69.8% female<br><br>Con: 60.8, 68.8% female | Internet course Mastery over<br>Dementia (MoD): problem<br>solving +cognitive restructuring<br>+assertiveness training<br>+homework<br><br>6 months (N=90)                                                                                                                                                                                                | A minimal<br>interventi<br>on (e-<br>bulletins)<br><br>(N=85) | 1.Depression: CES-<br>D (20)<br><br>2.Anxiety: HADS-<br>A (7)<br><br>Postintervention                                                                   |

|                                                    |                  |                                                                                                                             |                                                                                                                                                       |                   |                                                                                                                                                                   |                                            |
|----------------------------------------------------|------------------|-----------------------------------------------------------------------------------------------------------------------------|-------------------------------------------------------------------------------------------------------------------------------------------------------|-------------------|-------------------------------------------------------------------------------------------------------------------------------------------------------------------|--------------------------------------------|
| (Chien, et al., 2011) <sup>[7]</sup>               | China (HongKong) | Family caregivers<br>Int: 44.9, 67.4% female<br>Con: 45.6, 65.2% female                                                     | 1 month need's assessment +5 months sessions (education, sharing and discussion, psychological support and problem-solving)<br>6 months (N=46)        | Usual care (N=46) | 1.Burden: FCBI                                                                                                                                                    | Postintervention<br>12 months<br>18 months |
| (Cristanch o-Lacroix, et al., 2015) <sup>[8]</sup> | France           | Informal caregivers (scored 12 or more on the Perceived Stress Scale)<br>Int: 64.2, 64.0% female<br>Con: 59.0, 67.0% female | Web-based program (once a Week)<br>(education +skill training +coping with behavioral +social and financial support +peer support)<br>3 months (N=25) | Usual care (N=24) | 1.Stress: PSS-14<br>2.Self-efficacy: RSCSE<br>3.Subject burden: ZBI<br>4.Depression: BDI-II<br>5.Self-perceived emotion: NHP<br>6. Relationship satisfaction: VAS | Postintervention<br>6 months               |

|                                         |               |                                                                                           |                                                                                                                                                                                             |                                                                 |                                                    |                  |
|-----------------------------------------|---------------|-------------------------------------------------------------------------------------------|---------------------------------------------------------------------------------------------------------------------------------------------------------------------------------------------|-----------------------------------------------------------------|----------------------------------------------------|------------------|
| (Duggleby, et al., 2018) <sup>[9]</sup> | Canada        | Informal caregivers<br>Int: 63.4, 79.0% female<br>Con: 63.9, 84.0% female                 | Web-based intervention-MT4C:<br>(1) about me (2) common changes to expect (3) frequently asked questions (4) resources (5) important health information (6) calendar<br><br>3 months (N=78) | Usual care (N=89)                                               | 1.Self-efficacy: GSES                              | Postintervention |
| (Elliott, et al., 2010) <sup>[10]</sup> | United States | Family caregivers and close friends<br>Int: 62.3, 81.8% female<br>Con: 60.2, 85.8% female | REACH (Dyadic):<br>Information +didactic instruction +role playing +problem solving +skills training +stress management techniques +telephone support groups<br><br>6 months (N=257)        | Education materials +2 brief telephone "check-in" calls (N=238) | 1.Mood improvement: questionnaire-mood improvement | Postintervention |
| (Fei, et al., 2009) <sup>[11]</sup>     | China         | Relative caregivers<br>Int: 54.5, 77.4% female<br>Con: 56.1, 64.7% female                 | Assessment +knowledge and skill guidance +pressure identification and regulation<br><br>3 months (N=31)                                                                                     | Usual care (N=34)                                               | 1.Depression (SCL-90)<br><br>2.Anxiety (SCL-90)    | Postintervention |

|                                |               |                                                                           |                                                                                                                                                                                                    |                                        |                                                  |                  |
|--------------------------------|---------------|---------------------------------------------------------------------------|----------------------------------------------------------------------------------------------------------------------------------------------------------------------------------------------------|----------------------------------------|--------------------------------------------------|------------------|
| (Gitlin, et al., 2010)<br>[12] | United States | Family caregivers<br>Int: 62.4, 90.7% female<br>Con: 62.0, 87.3% female   | The COPE program (Dyadic):<br>Assessments +caregiver education (patient capabilities, potential effects of medications, pain, constipation, dehydration)<br>+reduce stress<br><br>4 months (N=102) | Usual care (N=107)                     | 1.Well-being: The 13-item Perceived Change Index | Postintervention |
| (Gonyea, et al., 2006)<br>[13] | United States | Family caregivers<br>Mean age: 64.6, 67% female                           | Behavioral intervention (behavior therapy and behavioral activation) +discuss personal challenges +peer support +respite care<br><br>5 weeks (N=40)                                                | Psychoeducational intervention* (N=40) | 1.Burden: ZBI (12)                               | Postintervention |
| (Han, et al., 2020)<br>[14]    | Korea         | Relative caregivers<br>Int: 62.8, 83.3% female<br>Con: 59.4, 85.2% female | Dementia Live™ (The simulation-based empathy enhancement program) +The lecture-based education (information +communication strategies + stress management strategies)                              | The lecture-based education (N=27)     | 1.Well-being: (CarerQol-VAS)                     | Postintervention |

|                                         |                                    |                                                                           |                                                                                                                                                                                                                      |                           |                                                                         |                                          |
|-----------------------------------------|------------------------------------|---------------------------------------------------------------------------|----------------------------------------------------------------------------------------------------------------------------------------------------------------------------------------------------------------------|---------------------------|-------------------------------------------------------------------------|------------------------------------------|
|                                         |                                    |                                                                           | only once (N=24)                                                                                                                                                                                                     |                           |                                                                         |                                          |
| (Hattink, et al., 2015) <sup>[15]</sup> | Netherlands and the United Kingdom | Informal caregivers<br>Int: 52.9, 74.0% female<br>Con: 55.0, 69.0% female | STAR E-Learning course:<br><br>Dementia information +problem solving strategies +adaptation and coping influences behavior and mood +support strategies + positive and empathic communication<br><br>4 months (N=27) | Wait-list group<br>(N=32) | 1.Empathy: IRI<br><br>2.Burden: questionnaire<br><br>3.Competence: SSCQ | Postintervention                         |
| (Hepburn, et al., 2001) <sup>[16]</sup> | United States                      | Relative caregivers<br><br>Mean age: 65.0, 70.0% female                   | (Group Settings)<br><br>Information provision +concept development +role clarification +belief clarification +mastery-focused coaching<br><br>2 months (N=60)                                                        | Wait-list group<br>(N=34) | 1.Depression: CES-D (20)<br><br>2.Burden: ZBI (22)                      | 5 months                                 |
| (Huang, 2015) <sup>[17]</sup>           | China                              | Informal caregivers                                                       | Cognitive behavior intervention +health education +social support                                                                                                                                                    | Usual care<br>(N=10)      | 1.Depression (SDS)<br><br>2.Anxiety (SAS)                               | Postintervention<br>(In the ninth month) |

|                                           |                   |                                                                         |                                                                                                                      |                   |                   |                                                                                                 |                                                   |
|-------------------------------------------|-------------------|-------------------------------------------------------------------------|----------------------------------------------------------------------------------------------------------------------|-------------------|-------------------|-------------------------------------------------------------------------------------------------|---------------------------------------------------|
|                                           |                   |                                                                         | 12 months (N=10)                                                                                                     |                   |                   | 3.Positive aspects of caregiving                                                                |                                                   |
| (Kor, et al., 2019) <sup>[18]</sup>       | China (Hong Kong) | Family caregivers<br>Int: 58.2, 77.8% female<br>Con: 56.0, 88.9%        | (Group setting)<br><br>Mindfulness +psychoeducation sharing<br><br>10 weeks (N=18)                                   | activities +group | Usual care (N=18) | 1.Stress: PSS<br>2.Burden: ZBI<br>3.Depression: CES-D<br>4.Anxiety: HADS-A<br>5.Resilience: BRS | Postintervention<br>3 months                      |
| (Laakkonen, et al., 2016) <sup>[19]</sup> | Finland           | Spouse caregivers<br>Int: 75.9, 64.2% female<br>Con: 73.8, 60.9% female | (Dyadic)<br><br>Enhance self-efficacy and problem-solving skills and to provide peer support.<br><br>2 months (N=67) |                   | Usual care (N=67) | 1.Competence: SCQ                                                                               | Postintervention (In the third month)<br>9 months |
| (Liu, et al., 2007) <sup>[20]</sup>       | China             | Family caregivers<br>Int: 72.8                                          | Knowledge and skills guidance +cognitive function exercise                                                           |                   | Usual care (N=22) | 1.Depression: SDS<br>2.Anxiety: SAS                                                             | Postintervention                                  |



|                                          |                                             |                                                                                    |                                                                                                                              |                          |                                                           |                  |
|------------------------------------------|---------------------------------------------|------------------------------------------------------------------------------------|------------------------------------------------------------------------------------------------------------------------------|--------------------------|-----------------------------------------------------------|------------------|
|                                          |                                             | Con: 71.7                                                                          | +pressure identification and regulation                                                                                      |                          |                                                           |                  |
|                                          |                                             |                                                                                    | 12 months (N=18)                                                                                                             |                          |                                                           |                  |
| (Luo, et al., 2012)<br>[21]              | China                                       | Family caregivers                                                                  | Knowledge education +care Skills Instruction + psychology guidance                                                           | Usual care (N=76)        | 1.Depression: SDS<br>2.Anxiety: SAS                       | Postintervention |
|                                          |                                             |                                                                                    | 12 months (N=76)                                                                                                             |                          |                                                           |                  |
| (Marriott, et al., 2000) <sup>[22]</sup> | United Kingdom                              | Family caregivers (with a score on the General Health Questionnaire of 5 or above) | (Dyadic)<br>Family intervention +four booklets<br>(education +stress management +coping skill training)                      | Usual care (N=14)        | 1.Depression: BDI                                         | Postintervention |
|                                          |                                             | Int: 69.6, 64.2% female<br>Con: 58.1, 78.6% female                                 | 9 months (N=14)                                                                                                              |                          |                                                           | 12 months        |
| (Metcalfe, et al., 2019) <sup>[23]</sup> | Six European countries<br>(England /France/ | Informal caregivers<br>Int: 57.6, 60.0% female<br>Con: 57.2, 61.3% female          | Online program:<br>(medical explanations + management of cognitive and behavioral symptoms +adapting to relationship changes | Wait-list control (N=31) | 1.Self-efficacy: RSCSE<br>2.Stress: PSS<br>3.Burden: BSFC | Postintervention |

|                                   |                                                      |                                                                                   |                                                                                                                                                                                                                                                                  |                       |                                                                                           |                  |
|-----------------------------------|------------------------------------------------------|-----------------------------------------------------------------------------------|------------------------------------------------------------------------------------------------------------------------------------------------------------------------------------------------------------------------------------------------------------------|-----------------------|-------------------------------------------------------------------------------------------|------------------|
|                                   | Germany<br>/Netherl<br>ands/Por<br>tugal/Sw<br>eden) |                                                                                   | +available care +support +self-<br>care suggestions)                                                                                                                                                                                                             |                       |                                                                                           |                  |
|                                   |                                                      |                                                                                   | 6 weeks (N=30)                                                                                                                                                                                                                                                   |                       |                                                                                           |                  |
| (Pan, et al.,<br>2020) [24]       | China                                                | Family caregivers<br><br>Mean age: 54.5                                           | (Dyadic)<br><br>Consulting + problems coping<br>strategies + health education or<br>related information about<br>dementia<br><br>6 months (N=31)                                                                                                                 | Usual care<br>(N=32)  | 1.Depression: GDS<br><br>2.Stress: RSS                                                    | Postintervention |
| (Possin, et<br>al., 2019)<br>[25] | United<br>States                                     | Informal caregivers<br><br>Int: 65.3, 69.9% female<br><br>Con: 64.0, 73.1% female | (Dyadic)<br><br>the Care Ecosystem: (Immediate<br>needs +medication reconciliation<br>and review +safety screen and<br>recommendations +referrals and<br>caregiver education +caregiver<br>well-being +behavior<br>management +advance care<br>planning) monthly | Usual care<br>(N=229) | 1.Depression:<br>PHQ-9<br><br>2.Burden: ZBI (12)<br><br>3.Self-efficacy:<br>questionnaire | Postintervention |

|                                          |             |                                                                           |                                                                                                                                                                               |                             |                                                         |                              |
|------------------------------------------|-------------|---------------------------------------------------------------------------|-------------------------------------------------------------------------------------------------------------------------------------------------------------------------------|-----------------------------|---------------------------------------------------------|------------------------------|
|                                          |             |                                                                           | 12 months (N=426)                                                                                                                                                             |                             |                                                         |                              |
| (Prick, et al., 2015) <sup>[26]</sup>    | Netherlands | Family caregivers<br>Int: 73.0, 66.7% female<br>Con: 71.0, 77.8% female   | (Dyadic)<br>Physical exercise + support (psychoeducation +communication skills training + pleasant activities training)                                                       | Minimal intervention (N=54) | 1.Depression: PHQ-9<br>2.Stress: SPICC                  | Postintervention<br>6 months |
|                                          |             |                                                                           | 3 months (N=57)                                                                                                                                                               |                             |                                                         |                              |
| (Shata, et al., 2017) <sup>[27]</sup>    | Egypt       | Informal caregivers<br>Int: 49.4, 61.8% female<br>Con: 48.0, 69.5% female | Group psychoeducation (two sessions) +brief group CBT (six sessions, skills of handling problematic Behaviors +skill of coping and stress management) +group support sessions | Black control (N=59)        | 1.Depression: HDRS<br>2. Anxiety: TMAS<br>3.Burden: ZBI | Postintervention<br>5 months |
|                                          |             |                                                                           | 2 months (N=55)                                                                                                                                                               |                             |                                                         |                              |
| (Waldorff, et al., 2012) <sup>[28]</sup> | Denmark     | Informal caregivers                                                       | (Dyadic)<br>Counselling sessions +course (basic knowledge +experiences and coping strategies)                                                                                 | Usual care (N=143)          | 1.Depression: GDS                                       | Postintervention             |

|                                     |       |                                                                         |                                                                                                            |                                |                                                                                        |                  |
|-------------------------------------|-------|-------------------------------------------------------------------------|------------------------------------------------------------------------------------------------------------|--------------------------------|----------------------------------------------------------------------------------------|------------------|
|                                     |       |                                                                         | +additional intervention-<br>telephone follow-up                                                           |                                |                                                                                        |                  |
|                                     |       |                                                                         | +local support                                                                                             |                                |                                                                                        |                  |
|                                     |       |                                                                         | 8-12 months (N=128)                                                                                        |                                |                                                                                        |                  |
| (Yao, 2011) <sup>[29]</sup>         | China | Family caregivers<br>Mean age: 64.2, 50.6% female                       | Cognitive behavior intervention (Group discussion, situational training, role playing) + transitional care | Usual care (N=45)              | 1. Burden: CBI<br>2.Positive aspects of caregiving                                     | Postintervention |
|                                     |       |                                                                         | 6 months (N=44)                                                                                            |                                |                                                                                        |                  |
| (Yoo, et al., 2019) <sup>[30]</sup> | Korea | Family caregivers<br>Int: 65.9, 73.7% female<br>Con: 63.3, 84.2% female | Education +psychological support (CBT) +daily memory training +stress coping                               | Wait-list control group (N=19) | 1.Burden: ZBI<br>2.Depression : GDS<br>3.Well-being: PGCMS<br>4.Positive effect: PANAS | Postintervention |
|                                     |       |                                                                         | 8-10 weeks (N=19)                                                                                          |                                |                                                                                        |                  |

|                             |                                                    |                                                                                                                                           |                                     |                  |
|-----------------------------|----------------------------------------------------|-------------------------------------------------------------------------------------------------------------------------------------------|-------------------------------------|------------------|
| (Zhu, et al., 2016)<br>[31] | Family caregivers                                  | Collaborative care intervention:<br>Social support (Wechat)<br>+knowledge education + care<br>skills instruction + psychology<br>guidance | Usual care 1. Burden: CBI<br>(N=60) | Postintervention |
|                             | Int: 57.4, 64.5% female<br>Con: 59.2, 71.7% female |                                                                                                                                           |                                     |                  |
|                             |                                                    | 4 months (N=62)                                                                                                                           |                                     |                  |

---

*Note:* Int = Intervention group; Con = Control group; \* Psychoeducation: A single-component intervention (a structured approach to providing information [32]); CES-D = Centre for Epidemiologic Studies Depression Scale; RSCSE = Revised Scale for Caregiving Self-Efficacy; RAS = The seven-item relationship assessment scale; REACH = The Resources for Enhancing Alzheimer's Caregiver Health; ZBI = the Zarit caregiver burden interview; PHQ = the Patient Health Questionnaire; HADS-A = The Hospital Anxiety and Depression Scale; FCBI = Family Caregiving Burden Inventory; PSS-14 = the 14-item Perceived Stress Scale; WHOQoL-BREF = The World Health Organization Quality of Life Measure-Brief Version; BDI-II = The second version of the Beck Depression Inventory; NHP = Nottingham Health Profile; VAS = visual analog scales; MT4C = My Tools 4 Care; GSES = The General Self-Efficacy Scale; SCL-90 = Symptom Checklist 90; The COPE program = The Care of Persons with Dementia in their Environments program; CarerQoL-VAS = Care-related Quality of Life instrument- visual analog scales; IRI = The Interpersonal Reactivity Index; SSCQ = Sense of competence, the Short Sense of Competence Questionnaire; SDS = Self-rating depression scale; SAS = self-rating anxiety scale; BRS = Brief Resilience Scale; SCQ = the Sense of Competence Questionnaire; BSFC = Burden Scale for Family Caregivers; SPICC = The Dutch Self-Perceived Pressure from family care; HDRS = Arabic version of the Hamilton Depression Rating Scale; TMAS = the Taylor Manifest Anxiety Scale; GDS = Geriatric depression scale; PGCMS = The Korean version of the Philadelphia Geriatric Center Morale Scale; PANAS = The Positive Affect and Negative Affect Schedule.

## References

1. Au, A.; Wong, M.K.; Leung, L.M.; Leung, P.; Wong, A. Telephone-assisted pleasant-event scheduling to enhance well-being of caregivers of people with dementia: a randomised controlled trial. *Hong Kong Med. J.* 2014, 20, 30-33.
2. Au, A.; Gallagher-Thompson, D.; Wong, M.K.; Leung, J.; Chan, W.C.; Chan, C.C.; Lu, H.J.; Lai, M.K.; Chan, K. Behavioral activation for dementia caregivers: scheduling pleasant events and enhancing communications. *Clin. Interv. Aging* 2015, 10, 611-619, doi:10.2147/cia.s72348.
3. Belle, S.H.; Burgio, L.; Burns, R.; Coon, D.; Czaja, S.J.; Gallagher-Thompson, D.; Gitlin, L.N.; Klinger, J.; Koepke, K.M.; Lee, C.C.; et al. Enhancing the quality of life of dementia caregivers from different ethnic or racial groups - A randomized, controlled trial. *Ann. Intern. Med.* 2006, 145, 727-738, doi:10.7326/0003-4819-145-10-200611210-00005.
4. Berwig, M.; Heinrich, S.; Spahlholz, J.; Hallensleben, N.; Brahler, E.; Gertz, H.-J. Individualized support for informal caregivers of people with dementia - effectiveness of the German adaptation of REACH II. *BMC Geriatr.* 2017, 17, 286, doi:https://dx.doi.org/10.1186/s12877-017-0678-y.
5. Birkenhäger-Gillesse, E.G.; Achterberg, W.P.; Janus, S.I.M.; Kollen, B.J.; Zuidema, S.U. Effects of caregiver dementia training in caregiver-patient dyads: A randomized controlled study. *Int. J. Geriatr. Psychiatry* 2020, 35, 1376-1384, doi:10.1002/gps.5378.
6. Blom, M.M.; Zarit, S.H.; Groot Zwaafink, R.B.; Cuijpers, P.; Pot, A.M. Effectiveness of an Internet intervention for family caregivers of people with dementia: results of a randomized controlled trial. *PLoS One* 2015, 10, e0116622, doi:10.1371/journal.pone.0116622.
7. Chien, W.T.; Lee, I.Y.M. Randomized controlled trial of a dementia care programme for families of home-resided older people with dementia. *J. Adv. Nurs.* 2011, 67, 774-787, doi:10.1111/j.1365-2648.2010.05537.x.
8. Cristancho-Lacroix, V.; Wrobel, J.; Cantegreil-Kallen, I.; Dub, T.; Rouquette, A.; Rigaud, A.-S. A web-based psychoeducational program for informal caregivers of patients with Alzheimer's disease: a pilot randomized controlled trial. *J. Med. Internet Res.* 2015, 17, e117-e117, doi:10.2196/jmir.3717.
9. Duggleby, W.; Ploeg, J.; McAiney, C.; Peacock, S.; Fisher, K.; Ghosh, S.; Markle-Reid, M.; Swindle, J.; Williams, A.; Triscott, J.A.; et al. Web-Based intervention for family carers of persons with dementia and multiple chronic conditions (My Tools 4 Care): pragmatic randomized controlled trial. *J. Med. Internet Res.* 2018, 20, e10484, doi:https://dx.doi.org/10.2196/10484.
10. Elliott, A.F.; Burgio, L.D.; Decoster, J. Enhancing caregiver health: findings from the resources for enhancing Alzheimer's caregiver health II intervention. *J. Am. Geriatr. Soc.* 2010, 58, 30-37, doi:10.1111/j.1532-5415.2009.02631.x.
11. Fei, J.X.; Zhao, X.P.; Shen, L.Z. Investigation on nursing intervention improving coping style and emotional disorder of relatives of the senile dementia in hospital. *Chinese Journal Of Modern Nursing* 2009, 15, 2249-2251, doi:10.3760/cma.j.issn.1674-2907.2009.23.007. (in Chinese)
12. Gitlin, L.N.; Winter, L.; Dennis, M.P.; Hodgson, N.; Hauck, W.W. A biobehavioral home-based intervention and the well-being of patients with dementia and their caregivers: the COPE randomized trial. *JAMA* 2010, 304, 983-991, doi:10.1001/jama.2010.1253.
13. Gonyea, J.G.; O'Connor, M.K.; Boyle, P.A. Project CARE: a randomized controlled trial of a behavioral intervention group for Alzheimer's disease caregivers. *The Gerontologist* 2006, 46, 827-832.
14. Han, A.; Kim, T.H.; Hong, H. A factorial randomized controlled trial to examine separate and combined effects of a simulation-based empathy enhancement program and a lecture-based education program on family caregivers of people with dementia. *Aging Ment. Health* 2020, 1-11, doi:https://dx.doi.org/10.1080/13607863.2020.1768214.
15. Hattink, B.; Meiland, F.; van der Roest, H.; Kevern, P.; Abiuso, F.; Bengtsson, J.; Giuliano, A.; Duca, A.; Sanders, J.; Basnett, F.; et al. Web-based STAR E-Learning course increases empathy and understanding in dementia caregivers: results from a randomized controlled trial in the Netherlands and the United Kingdom. *J. Med. Internet Res.* 2015, 17, 15, doi:10.2196/jmir.4025.

16. Hepburn, K.W.; Tornatore, J.; Center, B.; Ostwald, S.W. Dementia family caregiver training: affecting beliefs about caregiving and caregiver outcomes. *J. Am. Geriatr. Soc.* 2001, 49, 450-457, doi:10.1046/j.1532-5415.2001.49090.x.
17. Huang, Y.N. Impact of comprehensive intervention on caregivers of patients with Alzheimer's disease. *Health Guide: Medical research* 2015, 0, 66-67. (in Chinese)
18. Kor, P.P.K.; Liu, J.Y.W.; Chien, W.T. Effects of a modified mindfulness-based cognitive therapy for family caregivers of people with dementia: A pilot randomized controlled trial. *Int. J. Nurs. Stud.* 2019, 98, 107-117, doi:https://doi.org/10.1016/j.ijnurstu.2019.02.020.
19. Laakkonen, M.-L.; Kautiainen, H.; Holtta, E.; Savikko, N.; Tilvis, R.S.; Strandberg, T.E.; Pitkala, K.H. Effects of self-management groups for people with dementia and their spouses--randomized controlled trial. *J. Am. Geriatr. Soc.* 2016, 64, 752-760, doi:https://dx.doi.org/10.1111/jgs.14055.
20. Liu, Q.S.; Shang, S.M.; Wang, Z.W.; Fu, Y.; Yue, P.; Zhang, H.; Liu, Y. Effects of a one-year nursing intervention on depression and anxiety in family caregivers of homebound patients with dementia. *Chinese Journal Of Behavioral Medical Science* 2007, 16, 172-174, doi:10.3760/cma.j.issn.1674-6554.2007.02.035. (in Chinese)
21. Luo, L.C.; Wang, J.A. Effect evaluation of nursing intervention on alleviating depression and anxiety among caregivers with Alzheimer's disease at home. *Today Nurse* 2012, 0, 22-24. (in Chinese)
22. Marriott, A.; Donaldson, C.; Tarrier, N.; Burns, A. Effectiveness of cognitive-behavioural family intervention in reducing the burden of care in carers of patients with Alzheimer's disease. *Br. J. Psychiatry* 2000, 176, 557-562, doi:10.1192/bjp.176.6.557.
23. Metcalfe, A.; Jones, B.; Mayer, J.; Gage, H.; Oyebode, J.; Boucault, S.; Aloui, S.; Schwertel, U.; Böhm, M.; Tezenas du Montcel, S.; et al. Online information and support for carers of people with young-onset dementia: A multi-site randomised controlled pilot study. *Int. J. Geriatr. Psychiatry* 2019, 34, 1455-1464, doi:10.1002/gps.5154.
24. Pan, Y.X.; Zhang, H.Y. Study of the effect of psychosocial intervention on depressive psychology and care burden of family caregivers of dementia patients. *Shanghai Medical & Pharmaceutical Journal* 2020, 41, 13-15, 49. (in Chinese)
25. Possin, K.L.; Merrilees, J.J.; Dulaney, S.; Bonasera, S.J.; Chiong, W.; Lee, K.; Hooper, S.M.; Allen, I.E.; Braley, T.; Bernstein, A.; et al. Effect of collaborative dementia care via telephone and internet on quality of life, caregiver well-being, and health care use: The Care Ecosystem randomized clinical trial. *JAMA Internal Medicine* 2019, 179, 1658-1667, doi:10.1001/jamainternmed.2019.4101.
26. Prick, A.-E.; de Lange, J.; Twisk, J.; Pot, A.M. The effects of a multi-component dyadic intervention on the psychological distress of family caregivers providing care to people with dementia: a randomized controlled trial. *Int. Psychogeriatr.* 2015, 27, 2031-2044, doi:https://dx.doi.org/10.1017/S104161021500071X.
27. Shata, Z.N.; Amin, M.R.; El-Kady, H.M.; Abu-Nazel, M.W. Efficacy of a multi-component psychosocial intervention program for caregivers of persons living with neurocognitive disorders, Alexandria, Egypt: A randomized controlled trial. *Avicenna journal of medicine* 2017, 7, 54-63, doi:10.4103/2231-0770.203610.
28. Waldorff, F.B.; Buss, D.V.; Eckermann, A.; Rasmussen, M.L.H.; Keiding, N.; Rishøj, S.; Siersma, V.; Sørensen, J.; Sørensen, L.V.; Vogel, A.; et al. Efficacy of psychosocial intervention in patients with mild Alzheimer's disease: the multicentre, rater blinded, randomised Danish Alzheimer Intervention Study (DAISY). *BMJ : British Medical Journal* 2012, 345, e4693, doi:10.1136/bmj.e4693.
29. Yao, A.H. Effect of cognitive-behavior intervention on caregivers of alzheimer's disease patients. *Chinese Journal of Modern Nursing* 2011, 17, 373-375, doi:10.3760/cma.j.issn.1674-2907.2011.04.001. (in Chinese)
30. Yoo, R.; Yeom, J.; Kim, G.H.; Park, H.K.; Kang, Y.; Hwang, J.; Choi, S.H.; Na, H.R.; Cho, S.J.; Yu, K.H.; et al. A multicenter, randomized clinical trial to assess the efficacy of a therapeutic intervention program for caregivers of people with dementia. *J. Clin. Neurol.* 2019, 15, 235-242, doi:https://dx.doi.org/10.3988/jcn.2019.15.2.235.
31. Zhu, B.; Lin, Z.; He, X.J.; Shao, Z.M. Influence of collaborative care model on the burden of family caregivers of senile dementia patients in the community. *Modern Medical Journal* 2016, 44, 1780-1784, doi:10.3969/j.issn.1671-7562.2016.12.034. (in Chinese)
32. Pink, J.; O'Brien, J.; Robinson, L.; Longson, D. Dementia: Assessment, Management and Support: Summary of Updated NICE Guidance. *BMJ* 2018, 361, k2438, doi:10.1136/bmj.k2438.
