# Supplementary material for: The Effectiveness of Multi-Component Interventions on the Positive and Negative Aspects of Well-Being among Informal Caregivers of People with Dementia: A Systematic Review and Meta-Analysis
Source: Int J Environ Res Public Health. 2022 Jun 7;19(12):6973. doi: 10.3390/ijerph19126973 (PMC9222573; doi:10.3390/ijerph19126973)
Supplement: Supplementary file 1 [file ijerph-19-06973-s001.zip]

Archive with 7 entries (7 files):
- Figure S1_Risk of bias in included studies.pdf
- Figure S2_Effect of multi-component interventions on informal caregiverí»s burden, anxiety and stress (postintervention).pdf
- Figure S3_Funnel plots.pdf
- Table S1_PRISMA 2020 Checklist.pdf
- Table S2_The full electronic search strategy for the databases.pdf
- Table S3. Characteristics of included studies.pdf
- Table S4. The results of subgroup analysis by delivery methods and participant types.pdf
