# Supplementary figures and images for: The Effectiveness of Multi-Component Interventions on the Positive and Negative Aspects of Well-Being among Informal Caregivers of People with Dementia: A Systematic Review and Meta-Analysis
Source: MDPI journal article supplement (doi:10.3390/ijerph19126973), 2022-06-07

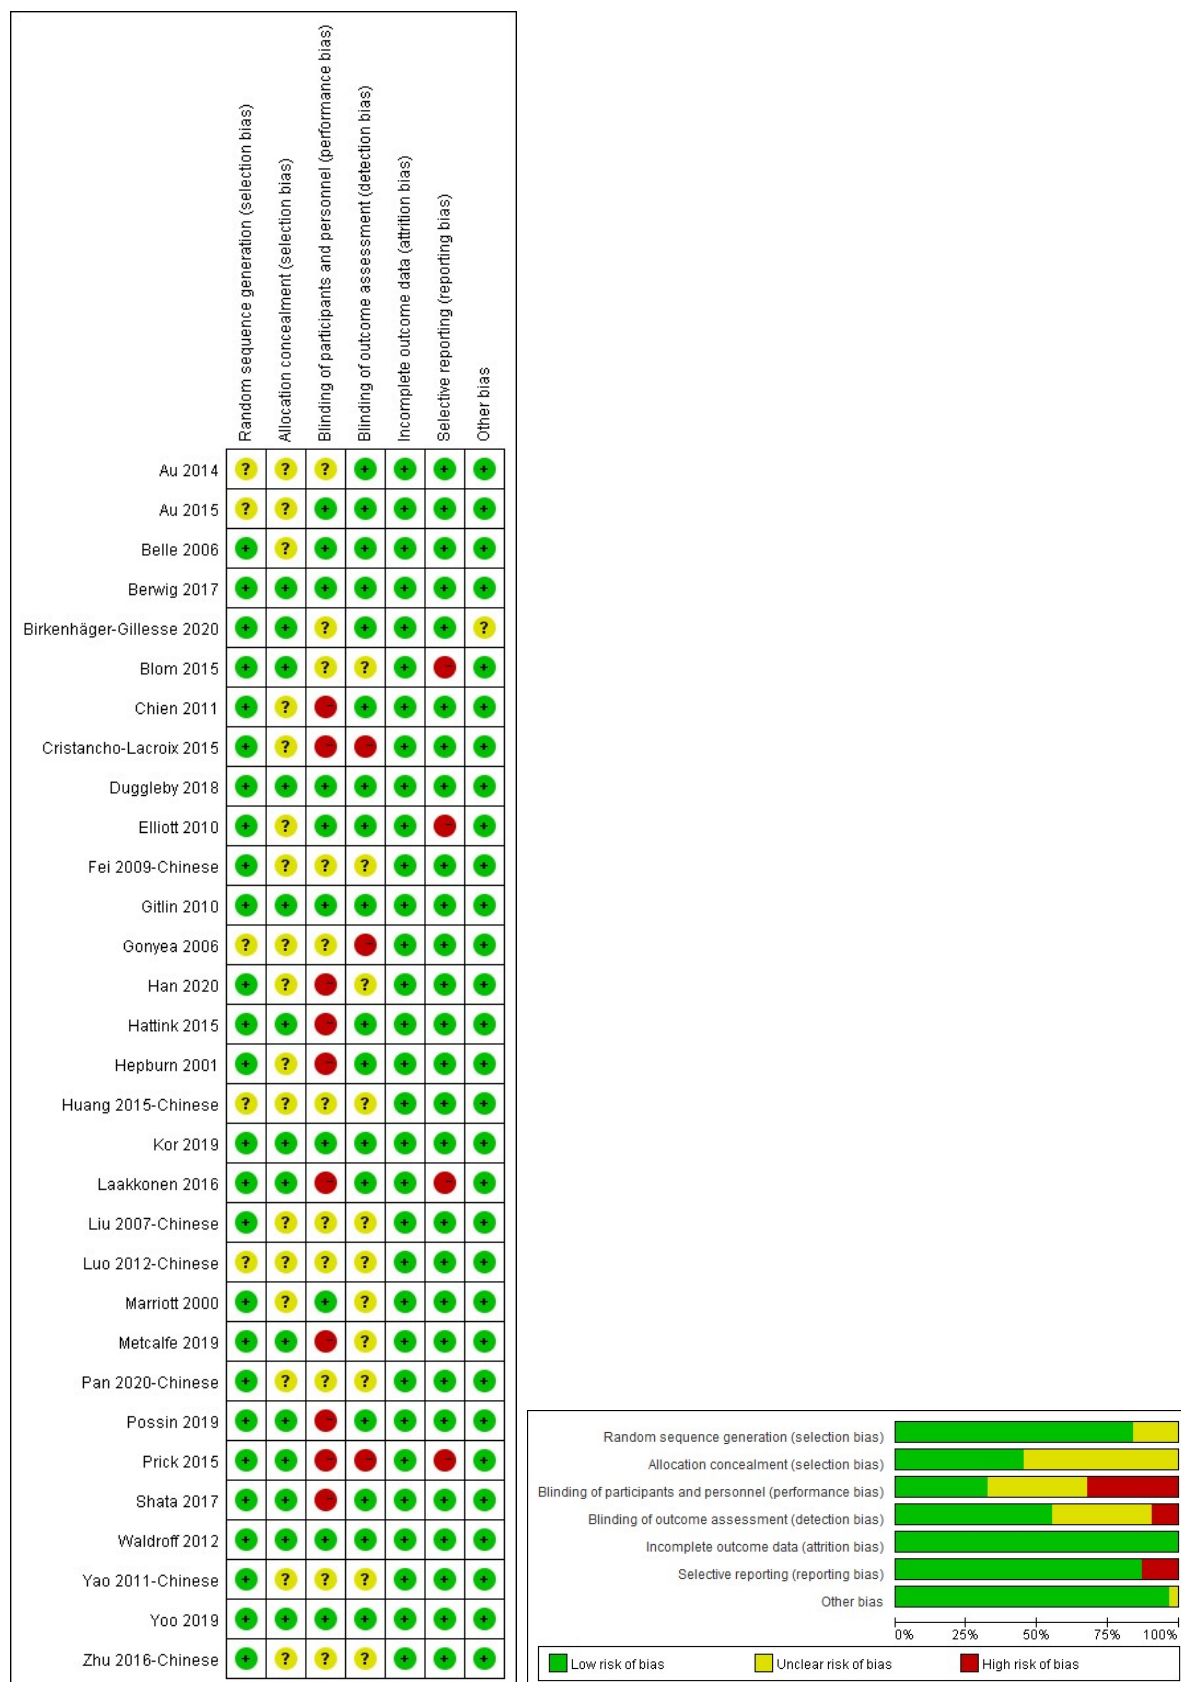

**Figure S1.** Risk of bias in included studies.

Supplement: s1 [file s1]
